# Supplementary material
Source: PubMed Central journal article supplement (PMC11357832)
Supplement: NIHMS2010931-supplement-Silverberg_PMID31628927_JInvestDerm_2020_SupplTablesS1-S6.pdf [file NIHMS2010931-supplement-Silverberg_PMID31628927_JInvestDerm_2020_SupplTablesS1-S6.pdf]

| <b>Supplementary Table S1. Summary statistics and correlation of item responses with intensity of worst and average itch and frequency of itch.</b> |                                                                                                                                                 |             |           |                                    |                |                |                |                |                                 |                     |                          |
|-----------------------------------------------------------------------------------------------------------------------------------------------------|-------------------------------------------------------------------------------------------------------------------------------------------------|-------------|-----------|------------------------------------|----------------|----------------|----------------|----------------|---------------------------------|---------------------|--------------------------|
| <b>Item No.</b>                                                                                                                                     | <b>Item</b>                                                                                                                                     | <b>Mean</b> | <b>SD</b> | <b>Response Category Frequency</b> |                |                |                |                | <b>Pearson correlation (r)*</b> |                     |                          |
|                                                                                                                                                     |                                                                                                                                                 |             |           | <b>0</b>                           | <b>1</b>       | <b>2</b>       | <b>3</b>       | <b>4</b>       | <b>Worst itch</b>               | <b>Average itch</b> | <b>Frequency of itch</b> |
| <b>Q1</b>                                                                                                                                           | ...because of itch, I was less active.                                                                                                          | 2.90        | 1.17      | 91<br>(15.2%)                      | 117<br>(20.2%) | 210<br>(35.2%) | 128<br>(21.2%) | 54<br>(9.2%)   | 0.59                            | 0.60                | 0.59                     |
| <b>Q2</b>                                                                                                                                           | ...because of itch, I limited exercising.                                                                                                       | 2.84        | 1.27      | 121<br>(20.2%)                     | 108<br>(18.2%) | 184<br>(31.2%) | 118<br>(20.2%) | 69<br>(12.2%)  | 0.55                            | 0.56                | 0.51                     |
| <b>Q3</b>                                                                                                                                           | ...because of itch, it was hard to do some types of exercise.                                                                                   | 2.89        | 1.27      | 117<br>(20.2%)                     | 105<br>(18.2%) | 169<br>(28.2%) | 145<br>(24.2%) | 64<br>(11.2%)  | 0.57                            | 0.59                | 0.53                     |
| <b>Q4</b>                                                                                                                                           | ...because of itch, it was hard to run.                                                                                                         | 2.76        | 1.32      | 152<br>(25.2%)                     | 90<br>(15.2%)  | 172<br>(29.2%) | 120<br>(20.2%) | 66<br>(11.2%)  | 0.53                            | 0.58                | 0.52                     |
| <b>Q5</b>                                                                                                                                           | ...because of itch, it was hard to walk.                                                                                                        | 2.55        | 1.24      | 158<br>(26.2%)                     | 139<br>(23.2%) | 165<br>(28.2%) | 94<br>(16.2%)  | 44<br>(7.2%)   | 0.55                            | 0.59                | 0.51                     |
| <b>Q6</b>                                                                                                                                           | ...because of itch, it was hard to do vigorous physical activity, such as running, lifting heavy objects, or participating in strenuous sports. | 2.86        | 1.30      | 120<br>(20.2%)                     | 122<br>(20.2%) | 155<br>(26.2%) | 131<br>(22.2%) | 72<br>(12.2%)  | 0.55                            | 0.56                | 0.52                     |
| <b>Q7</b>                                                                                                                                           | ...because of itch, it was hard to do moderate physical activity, such as moving a table, pushing a vacuum cleaner, bowling, or playing golf.   | 2.69        | 1.23      | 131<br>(22.2%)                     | 134<br>(22.2%) | 167<br>(28.2%) | 124<br>(21.2%) | 44<br>(7.2%)   | 0.57                            | 0.59                | 0.53                     |
| <b>Q8</b>                                                                                                                                           | ...because of itch, it was hard to do light physical activity.                                                                                  | 2.64        | 1.22      | 135<br>(23.2%)                     | 144<br>(24.2%) | 172<br>(29.2%) | 101<br>(17.2%) | 48<br>(8.2%)   | 0.55                            | 0.60                | 0.50                     |
| <b>Q9</b>                                                                                                                                           | ...because of itch, I sat around more than usual.                                                                                               | 2.92        | 1.30      | 120<br>(20.2%)                     | 96<br>(16.2%)  | 167<br>(28.2%) | 144<br>(24.2%) | 73<br>(12.2%)  | 0.60                            | 0.61                | 0.55                     |
| <b>Q10</b>                                                                                                                                          | ...because of itch, it was hard to do activities that made me sweat.                                                                            | 3.12        | 1.30      | 92<br>(15.2%)                      | 87<br>(15.2%)  | 185<br>(31.2%) | 128<br>(21.2%) | 108<br>(18.2%) | 0.57                            | 0.55                | 0.57                     |
| <b>Q11</b>                                                                                                                                          | ...because of itch, I did as little as possible physically.                                                                                     | 2.85        | 1.25      | 116<br>(19.2%)                     | 108<br>(18.2%) | 188<br>(31.2%) | 124<br>(21.2%) | 64<br>(11.2%)  | 0.59                            | 0.61                | 0.56                     |
| <b>Q12</b>                                                                                                                                          | ...because of itch, I had balance problems.                                                                                                     | 2.28        | 1.31      | 248<br>(41.2%)                     | 101<br>(17.2%) | 130<br>(22.2%) | 78<br>(13.2%)  | 43<br>(7.2%)   | 0.41                            | 0.49                | 0.40                     |
| <b>Q13</b>                                                                                                                                          | ...because of itch, I limited the clothing I could wear.                                                                                        | 3.12        | 1.27      | 91<br>(15.2%)                      | 79<br>(13.2%)  | 194<br>(32.2%) | 139<br>(23.2%) | 97<br>(16.2%)  | 0.55                            | 0.52                | 0.53                     |
| <b>Q14</b>                                                                                                                                          | ...because of itch, it was hard to wear short-sleeves.                                                                                          | 2.57        | 1.30      | 176<br>(29.2%)                     | 115<br>(19.2%) | 152<br>(25.2%) | 106<br>(18.2%) | 51<br>(9.2%)   | 0.47                            | 0.51                | 0.43                     |
| <b>Q15</b>                                                                                                                                          | ...because of itch, it was hard to wear shorts.                                                                                                 | 2.66        | 1.38      | 178<br>(30.2%)                     | 100<br>(17.2%) | 151<br>(25.2%) | 93<br>(16.2%)  | 78<br>(13.2%)  | 0.51                            | 0.56                | 0.47                     |

| <b>Supplementary Table S1. Summary statistics and correlation of item responses with intensity of worst and average itch and frequency of itch.</b> |                                                              |             |           |                                    |                |                |                |                |                                 |                     |                          |
|-----------------------------------------------------------------------------------------------------------------------------------------------------|--------------------------------------------------------------|-------------|-----------|------------------------------------|----------------|----------------|----------------|----------------|---------------------------------|---------------------|--------------------------|
| <b>Item No.</b>                                                                                                                                     | <b>Item</b>                                                  | <b>Mean</b> | <b>SD</b> | <b>Response Category Frequency</b> |                |                |                |                | <b>Pearson correlation (r)*</b> |                     |                          |
|                                                                                                                                                     |                                                              |             |           | <b>0</b>                           | <b>1</b>       | <b>2</b>       | <b>3</b>       | <b>4</b>       | <b>Worst itch</b>               | <b>Average itch</b> | <b>Frequency of itch</b> |
| <b>Q16</b>                                                                                                                                          | ...because of itch, it was hard to wear wool clothing.       | 3.30        | 1.46      | 111<br>(19.2%)                     | 69<br>(12.2%)  | 122<br>(20.2%) | 128<br>(21.2%) | 170<br>(28.2%) | 0.48                            | 0.49                | 0.46                     |
| <b>Q17</b>                                                                                                                                          | ...because of itch, it was hard to wear tight clothing.      | 3.25        | 1.31      | 86<br>(14.2%)                      | 70<br>(12.2%)  | 184<br>(31.2%) | 131<br>(22.2%) | 129<br>(22.2%) | 0.54                            | 0.54                | 0.55                     |
| <b>Q18</b>                                                                                                                                          | ...because of itch, it was hard to wear warm clothing.       | 3.09        | 1.33      | 104<br>(17.2%)                     | 83<br>(14.2%)  | 174<br>(29.2%) | 132<br>(22.2%) | 107<br>(18.2%) | 0.52                            | 0.53                | 0.51                     |
| <b>Q19</b>                                                                                                                                          | ...because of itch, it was hard to wear certain shoes.       | 2.59        | 1.38      | 196<br>(33.2%)                     | 92<br>(15.2%)  | 146<br>(24.2%) | 97<br>(16.2%)  | 69<br>(12.2%)  | 0.43                            | 0.45                | 0.39                     |
| <b>Q20</b>                                                                                                                                          | ...It was hard to wear shorts because of how my legs looked. | 2.80        | 1.37      | 153<br>(26.2%)                     | 98<br>(16.2%)  | 149<br>(25.2%) | 118<br>(20.2%) | 82<br>(14.2%)  | 0.46                            | 0.50                | 0.45                     |
| <b>Q21</b>                                                                                                                                          | ...because of itch, my physical activities were limited.     | 2.83        | 1.25      | 122<br>(20.2%)                     | 102<br>(17.2%) | 198<br>(33.2%) | 114<br>(19.2%) | 64<br>(11.2%)  | 0.58                            | 0.61                | 0.54                     |
| <b>Q22</b>                                                                                                                                          | ...because of itch, I was nervous.                           | 3.05        | 1.30      | 100<br>(17.2%)                     | 94<br>(16.2%)  | 177<br>(30.2%) | 133<br>(22.2%) | 96<br>(16.2%)  | 0.51                            | 0.55                | 0.50                     |
| <b>Q23</b>                                                                                                                                          | ...I was afraid my itch would never go away.                 | 3.34        | 1.21      | 56<br>(9.2%)                       | 83<br>(14.2%)  | 186<br>(31.2%) | 153<br>(26.2%) | 122<br>(20.2%) | 0.60                            | 0.59                | 0.60                     |
| <b>Q24</b>                                                                                                                                          | ...my itch was annoying.                                     | 3.89        | 1.11      | 22<br>(4.2%)                       | 42<br>(7.2%)   | 147<br>(25.2%) | 159<br>(27.2%) | 230<br>(38.2%) | 0.53                            | 0.49                | 0.57                     |
| <b>Q25</b>                                                                                                                                          | ...because of itch, my thinking was slowed.                  | 2.55        | 1.33      | 176<br>(29.2%)                     | 131<br>(22.2%) | 140<br>(23.2%) | 91<br>(15.2%)  | 62<br>(10.2%)  | 0.49                            | 0.55                | 0.43                     |
| <b>Q26</b>                                                                                                                                          | ...because of itch, I felt angry.                            | 3.05        | 1.29      | 100<br>(17.2%)                     | 91<br>(15.2%)  | 181<br>(30.2%) | 134<br>(22.2%) | 94<br>(16.2%)  | 0.50                            | 0.52                | 0.44                     |
| <b>Q27</b>                                                                                                                                          | ...because of itch, I felt sad.                              | 2.76        | 1.32      | 141<br>(24.2%)                     | 111<br>(19.2%) | 176<br>(29.2%) | 97<br>(16.2%)  | 75<br>(13.2%)  | 0.48                            | 0.51                | 0.46                     |
| <b>Q28</b>                                                                                                                                          | ...because of itch, I felt depressed.                        | 2.69        | 1.35      | 158<br>(26.2%)                     | 119<br>(20.2%) | 158<br>(26.2%) | 84<br>(14.2%)  | 81<br>(14.2%)  | 0.50                            | 0.55                | 0.46                     |
| <b>Q29</b>                                                                                                                                          | ...because of itch, I felt irritable.                        | 3.31        | 1.20      | 57<br>(10.2%)                      | 83<br>(14.2%)  | 190<br>(32.2%) | 157<br>(26.2%) | 113<br>(19.2%) | 0.51                            | 0.50                | 0.43                     |
| <b>Q30</b>                                                                                                                                          | ...because of itch, I felt miserable.                        | 3.15        | 1.28      | 77<br>(13.2%)                      | 109<br>(18.2%) | 175<br>(29.2%) | 124<br>(21.2%) | 115<br>(19.2%) | 0.56                            | 0.57                | 0.52                     |
| <b>Q31</b>                                                                                                                                          | ...because of itch, I felt frustrated.                       | 3.42        | 1.23      | 59<br>(10.2%)                      | 60<br>(10.2%)  | 194<br>(32.2%) | 144<br>(24.2%) | 143<br>(24.2%) | 0.55                            | 0.54                | 0.49                     |
| <b>Q32</b>                                                                                                                                          | ...because of itch, I felt embarrassed.                      | 2.98        | 1.32      | 107<br>(18.2%)                     | 108<br>(18.2%) | 174<br>(29.2%) | 112<br>(19.2%) | 99<br>(17.2%)  | 0.55                            | 0.53                | 0.47                     |

| <b>Supplementary Table S1. Summary statistics and correlation of item responses with intensity of worst and average itch and frequency of itch.</b> |                                                                                              |             |           |                                    |                |                |                |                |                                 |                     |                          |
|-----------------------------------------------------------------------------------------------------------------------------------------------------|----------------------------------------------------------------------------------------------|-------------|-----------|------------------------------------|----------------|----------------|----------------|----------------|---------------------------------|---------------------|--------------------------|
| <b>Item No.</b>                                                                                                                                     | <b>Item</b>                                                                                  | <b>Mean</b> | <b>SD</b> | <b>Response Category Frequency</b> |                |                |                |                | <b>Pearson correlation (r)*</b> |                     |                          |
|                                                                                                                                                     |                                                                                              |             |           | <b>0</b>                           | <b>1</b>       | <b>2</b>       | <b>3</b>       | <b>4</b>       | <b>Worst itch</b>               | <b>Average itch</b> | <b>Frequency of itch</b> |
| <b>Q33</b>                                                                                                                                          | ...because of itch, I was distracted.                                                        | 3.21        | 1.19      | 56<br>(9.2%)                       | 103<br>(17.2%) | 201<br>(34.2%) | 139<br>(23.2%) | 101<br>(17.2%) | 0.57                            | 0.56                | 0.52                     |
| <b>Q34</b>                                                                                                                                          | ...I worried that others would see me scratching.                                            | 3.23        | 1.29      | 78<br>(13.2%)                      | 88<br>(15.2%)  | 180<br>(30.2%) | 129<br>(22.2%) | 125<br>(21.2%) | 0.53                            | 0.55                | 0.52                     |
| <b>Q35</b>                                                                                                                                          | ...because of itch, I was self-conscious.                                                    | 3.24        | 1.26      | 75<br>(13.2%)                      | 79<br>(13.2%)  | 188<br>(31.2%) | 143<br>(24.2%) | 115<br>(19.2%) | 0.57                            | 0.56                | 0.55                     |
| <b>Q36</b>                                                                                                                                          | ...because of itch, people avoided touching me (ex: holding my hand).                        | 2.54        | 1.39      | 199<br>(33.2%)                     | 109<br>(18.2%) | 135<br>(23.2%) | 82<br>(14.2%)  | 75<br>(13.2%)  | 0.43                            | 0.47                | 0.42                     |
| <b>Q37</b>                                                                                                                                          | ...because of itch, I avoided certain foods.                                                 | 2.50        | 1.35      | 200<br>(33.2%)                     | 107<br>(18.2%) | 146<br>(24.2%) | 85<br>(14.2%)  | 62<br>(10.2%)  | 0.38                            | 0.44                | 0.36                     |
| <b>Q38</b>                                                                                                                                          | ...because of itch, it was hard to shower or take a bath.                                    | 2.53        | 1.36      | 195<br>(33.2%)                     | 106<br>(18.2%) | 151<br>(25.2%) | 81<br>(14.2%)  | 67<br>(11.2%)  | 0.46                            | 0.48                | 0.44                     |
| <b>Q39</b>                                                                                                                                          | ...because of itch, it was hard to watch television.                                         | 2.48        | 1.30      | 192<br>(32.2%)                     | 124<br>(21.2%) | 141<br>(24.2%) | 93<br>(16.2%)  | 50<br>(8.2%)   | 0.49                            | 0.53                | 0.46                     |
| <b>Q40</b>                                                                                                                                          | ...because of itch, it was hard to play games (ex: board games, computer games, phone apps). | 2.57        | 1.37      | 188<br>(31.2%)                     | 111<br>(19.2%) | 146<br>(24.2%) | 84<br>(14.2%)  | 71<br>(12.2%)  | 0.47                            | 0.51                | 0.47                     |
| <b>Q41</b>                                                                                                                                          | ...because of itch, it was hard to read a book.                                              | 2.58        | 1.33      | 170<br>(28.2%)                     | 135<br>(23.2%) | 137<br>(23.2%) | 93<br>(16.2%)  | 65<br>(11.2%)  | 0.48                            | 0.52                | 0.44                     |
| <b>Q42</b>                                                                                                                                          | ...because of itch, it was hard to watch a movie.                                            | 2.53        | 1.31      | 179<br>(30.2%)                     | 126<br>(21.2%) | 151<br>(25.2%) | 87<br>(15.2%)  | 57<br>(10.2%)  | 0.49                            | 0.53                | 0.47                     |
| <b>Q43</b>                                                                                                                                          | ...because of itch, I had to stop what I was doing to scratch.                               | 3.44        | 1.19      | 50<br>(8.2%)                       | 68<br>(11.2%)  | 184<br>(31.2%) | 165<br>(28.2%) | 133<br>(22.2%) | 0.57                            | 0.56                | 0.58                     |
| <b>Q44</b>                                                                                                                                          | ...because of itch, I made more mistakes than normal.                                        | 2.66        | 1.25      | 133<br>(22.2%)                     | 152<br>(25.2%) | 156<br>(26.2%) | 103<br>(17.2%) | 56<br>(9.2%)   | 0.52                            | 0.54                | 0.46                     |
| <b>Q45</b>                                                                                                                                          | ...because of itch, it was hard to sit still.                                                | 3.14        | 1.26      | 75<br>(13.2%)                      | 109<br>(18.2%) | 186<br>(31.2%) | 120<br>(20.2%) | 110<br>(18.2%) | 0.56                            | 0.57                | 0.52                     |
| <b>Q46</b>                                                                                                                                          | ...because of itch, it was hard to do even simple tasks.                                     | 2.77        | 1.31      | 130<br>(22.2%)                     | 134<br>(22.2%) | 152<br>(25.2%) | 112<br>(19.2%) | 72<br>(12.2%)  | 0.54                            | 0.60                | 0.53                     |
| <b>Q47</b>                                                                                                                                          | ...because of itch, it was hard to relax                                                     | 3.20        | 1.20      | 57<br>(10.2%)                      | 110<br>(18.2%) | 194<br>(32.2%) | 136<br>(23.2%) | 103<br>(17.2%) | 0.59                            | 0.58                | 0.53                     |
| <b>Q48</b>                                                                                                                                          | ...because of itch, I was restless.                                                          | 3.25        | 1.22      | 58<br>(10.2%)                      | 102<br>(17.2%) | 185<br>(31.2%) | 143<br>(24.2%) | 112<br>(19.2%) | 0.60                            | 0.59                | 0.57                     |
| <b>Q49</b>                                                                                                                                          | ...my itch interfered with my sex life.                                                      | 2.60        | 1.44      | 202<br>(34.2%)                     | 96<br>(16.2%)  | 125<br>(21.2%) | 93<br>(16.2%)  | 84<br>(14.2%)  | 0.48                            | 0.51                | 0.47                     |

| <b>Supplementary Table S1. Summary statistics and correlation of item responses with intensity of worst and average itch and frequency of itch.</b> |                                                                    |             |           |                                    |                |                |                |                |                                 |                     |                          |
|-----------------------------------------------------------------------------------------------------------------------------------------------------|--------------------------------------------------------------------|-------------|-----------|------------------------------------|----------------|----------------|----------------|----------------|---------------------------------|---------------------|--------------------------|
| <b>Item No.</b>                                                                                                                                     | <b>Item</b>                                                        | <b>Mean</b> | <b>SD</b> | <b>Response Category Frequency</b> |                |                |                |                | <b>Pearson correlation (r)*</b> |                     |                          |
|                                                                                                                                                     |                                                                    |             |           | <b>0</b>                           | <b>1</b>       | <b>2</b>       | <b>3</b>       | <b>4</b>       | <b>Worst itch</b>               | <b>Average itch</b> | <b>Frequency of itch</b> |
| <b>Q50</b>                                                                                                                                          | ...because of itch, I had difficulty falling asleep.               | 3.24        | 1.22      | 64<br>(11.2%)                      | 96<br>(16.2%)  | 181<br>(30.2%) | 153<br>(26.2%) | 106<br>(18.2%) | 0.59                            | 0.56                | 0.57                     |
| <b>Q51</b>                                                                                                                                          | ...because of itch, I had trouble staying asleep.                  | 3.06        | 1.32      | 102<br>(17.2%)                     | 100<br>(17.2%) | 162<br>(27.2%) | 133<br>(22.2%) | 103<br>(17.2%) | 0.54                            | 0.54                | 0.54                     |
| <b>Q52</b>                                                                                                                                          | ...because of itch, I had trouble sleeping.                        | 3.18        | 1.31      | 85<br>(14.2%)                      | 95<br>(16.2%)  | 169<br>(28.2%) | 132<br>(22.2%) | 119<br>(20.2%) | 0.56                            | 0.55                | 0.56                     |
| <b>Q53</b>                                                                                                                                          | ...because of itch, my sleep was restless.                         | 3.10        | 1.28      | 89<br>(15.2%)                      | 101<br>(17.2%) | 171<br>(29.2%) | 140<br>(23.2%) | 99<br>(17.2%)  | 0.55                            | 0.55                | 0.56                     |
| <b>Q54</b>                                                                                                                                          | ...because of itch, I was absent from work.                        | 2.15        | 1.35      | 300<br>(50.2%)                     | 76<br>(13.2%)  | 103<br>(17.2%) | 76<br>(13.2%)  | 45<br>(8.2%)   | 0.39                            | 0.45                | 0.36                     |
| <b>Q55</b>                                                                                                                                          | ...because of itch, it was hard to work.                           | 2.72        | 1.32      | 150<br>(25.2%)                     | 113<br>(19.2%) | 159<br>(27.2%) | 113<br>(19.2%) | 65<br>(11.2%)  | 0.50                            | 0.55                | 0.48                     |
| <b>Q56</b>                                                                                                                                          | ...I limited activities with others because of how my skin looked. | 2.69        | 1.35      | 164<br>(27.2%)                     | 109<br>(18.2%) | 150<br>(25.2%) | 105<br>(18.2%) | 72<br>(12.2%)  | 0.51                            | 0.53                | 0.49                     |
| <b>Q57</b>                                                                                                                                          | ...because of itch, I avoided being around people.                 | 2.65        | 1.35      | 169<br>(28.2%)                     | 112<br>(19.2%) | 149<br>(25.2%) | 101<br>(17.2%) | 69<br>(12.2%)  | 0.51                            | 0.55                | 0.47                     |
| <b>Q58</b>                                                                                                                                          | ...because of itch, I avoided going out with friends.              | 2.63        | 1.38      | 180<br>(30.2%)                     | 108<br>(18.2%) | 141<br>(24.2%) | 96<br>(16.2%)  | 75<br>(13.2%)  | 0.50                            | 0.55                | 0.47                     |
| <b>Q59</b>                                                                                                                                          | ...because of itch, I avoided going to social events.              | 2.62        | 1.40      | 193<br>(32.2%)                     | 92<br>(15.2%)  | 140<br>(23.2%) | 103<br>(17.2%) | 72<br>(12.2%)  | 0.52                            | 0.54                | 0.49                     |
| <b>Q60</b>                                                                                                                                          | ...because of itch, people treated me differently.                 | 2.30        | 1.33      | 239<br>(40.2%)                     | 116<br>(19.2%) | 119<br>(20.2%) | 77<br>(13.2%)  | 49<br>(8.2%)   | 0.42                            | 0.46                | 0.38                     |
| <b>Q61</b>                                                                                                                                          | ...because of itch, I stayed home most of the time.                | 2.78        | 1.40      | 158<br>(26.2%)                     | 103<br>(17.2%) | 140<br>(23.2%) | 109<br>(18.2%) | 90<br>(15.2%)  | 0.48                            | 0.52                | 0.50                     |
| <b>Q62</b>                                                                                                                                          | ...because of itch, I avoided interacting with other people.       | 2.63        | 1.38      | 178<br>(30.2%)                     | 113<br>(19.2%) | 139<br>(23.2%) | 95<br>(16.2%)  | 75<br>(13.2%)  | 0.50                            | 0.54                | 0.50                     |
| <b>Q63</b>                                                                                                                                          | ...my Itch bothered people around me                               | 2.45        | 1.34      | 211<br>(35.2%)                     | 110<br>(18.2%) | 135<br>(23.2%) | 89<br>(15.2%)  | 55<br>(9.2%)   | 0.43                            | 0.47                | 0.41                     |
| <b>Q64</b>                                                                                                                                          | ...people told me to stop scratching.                              | 2.72        | 1.34      | 158<br>(26.2%)                     | 100<br>(17.2%) | 171<br>(29.2%) | 95<br>(16.2%)  | 76<br>(13.2%)  | 0.49                            | 0.51                | 0.46                     |
| <b>Q65</b>                                                                                                                                          | ...because of itch, I had to depend on the help of other people.   | 2.29        | 1.30      | 245<br>(41.2%)                     | 103<br>(17.2%) | 125<br>(21.2%) | 89<br>(15.2%)  | 38<br>(6.2%)   | 0.45                            | 0.49                | 0.39                     |
| <b>Q66</b>                                                                                                                                          | ...I worried that my itch would get worse if people touched me.    | 2.47        | 1.42      | 227<br>(38.2%)                     | 90<br>(15.2%)  | 127<br>(21.2%) | 84<br>(14.2%)  | 72<br>(12.2%)  | 0.45                            | 0.49                | 0.43                     |

| <b>Supplementary Table S1. Summary statistics and correlation of item responses with intensity of worst and average itch and frequency of itch.</b> |                                                                            |             |           |                                    |                |                |                |                |                                 |                     |                          |
|-----------------------------------------------------------------------------------------------------------------------------------------------------|----------------------------------------------------------------------------|-------------|-----------|------------------------------------|----------------|----------------|----------------|----------------|---------------------------------|---------------------|--------------------------|
| <b>Item No.</b>                                                                                                                                     | <b>Item</b>                                                                | <b>Mean</b> | <b>SD</b> | <b>Response Category Frequency</b> |                |                |                |                | <b>Pearson correlation (r)*</b> |                     |                          |
|                                                                                                                                                     |                                                                            |             |           | <b>0</b>                           | <b>1</b>       | <b>2</b>       | <b>3</b>       | <b>4</b>       | <b>Worst itch</b>               | <b>Average itch</b> | <b>Frequency of itch</b> |
| <b>Q67</b>                                                                                                                                          | ...because of itch, it was hard to interact with my family.                | 2.43        | 1.35      | 218<br>(36.2%)                     | 106<br>(18.2%) | 132<br>(22.2%) | 89<br>(15.2%)  | 55<br>(9.2%)   | 0.46                            | 0.51                | 0.42                     |
| <b>Q68</b>                                                                                                                                          | ...because of itch, I avoided hugging people.                              | 2.53        | 1.41      | 215<br>(36.2%)                     | 92<br>(15.2%)  | 123<br>(21.2%) | 102<br>(17.2%) | 68<br>(11.2%)  | 0.47                            | 0.50                | 0.42                     |
| <b>Q69</b>                                                                                                                                          | ...I was tired of people asking questions about my itching and scratching. | 2.73        | 1.39      | 173<br>(29.2%)                     | 84<br>(14.2%)  | 154<br>(26.2%) | 108<br>(18.2%) | 81<br>(14.2%)  | 0.50                            | 0.51                | 0.48                     |
| <b>Q70</b>                                                                                                                                          | ...my clothing got bloody from scratching. Select only one option.         | 2.44        | 1.33      | 206<br>(34.2%)                     | 119<br>(20.2%) | 143<br>(24.2%) | 72<br>(12.2%)  | 60<br>(10.2%)  | 0.47                            | 0.46                | 0.42                     |
| <b>Q71</b>                                                                                                                                          | ...I scratched myself until I bled.                                        | 2.55        | 1.29      | 171<br>(29.2%)                     | 128<br>(21.2%) | 159<br>(27.2%) | 86<br>(14.2%)  | 56<br>(9.2%)   | 0.47                            | 0.50                | 0.43                     |
| <b>Q72</b>                                                                                                                                          | ...I worried about flaking skin from scratching.                           | 2.99        | 1.33      | 105<br>(18.2%)                     | 123<br>(21.2%) | 144<br>(24.2%) | 130<br>(22.2%) | 98<br>(16.2%)  | 0.52                            | 0.53                | 0.51                     |
| <b>Q73</b>                                                                                                                                          | ...I worried about getting scars from scratching.                          | 2.92        | 1.42      | 126<br>(21.2%)                     | 131<br>(22.2%) | 124<br>(21.2%) | 102<br>(17.2%) | 117<br>(20.2%) | 0.52                            | 0.54                | 0.47                     |
| <b>Q74</b>                                                                                                                                          | ...it was hard to stop scratching or rubbing.                              | 3.40        | 1.18      | 42<br>(7.2%)                       | 92<br>(15.2%)  | 180<br>(30.2%) | 157<br>(26.2%) | 129<br>(22.2%) | 0.58                            | 0.57                | 0.58                     |
| <b>Q75</b>                                                                                                                                          | ...I worried about having open wounds from scratching.                     | 2.89        | 1.38      | 133<br>(22.2%)                     | 117<br>(20.2%) | 126<br>(21.2%) | 130<br>(22.2%) | 94<br>(16.2%)  | 0.55                            | 0.59                | 0.50                     |

\* Pearson correlation,  $P < 0.0001$  for all.

**Supplementary Table S2. Item response theory parameters for items in the item banks.**

| Item   |                                                                                              | Calibration Statistics |          |          |          |          |
|--------|----------------------------------------------------------------------------------------------|------------------------|----------|----------|----------|----------|
| Number | Stem                                                                                         | Discrimination         | Location | Location | Location | Location |
| Q22    | ...because of itch, I had balance problems.                                                  | 2.7439                 | -0.3185  | 0.1812   | 0.9159   | 1.6642   |
| Q35    | ...because of itch, my thinking was slowed.                                                  | 2.9998                 | -0.6902  | -0.0392  | 0.6988   | 1.3975   |
| Q46    | ...because of itch, people avoided touching me (ex: holding my hand).                        | 3.2614                 | -0.5524  | -0.0024  | 0.6687   | 1.2309   |
| Q47    | ...because of itch, I avoided certain foods.                                                 | 2.5469                 | -0.5868  | -0.0382  | 0.7445   | 1.4554   |
| Q48    | ...because of itch, it was hard to shower or take a bath.                                    | 3.1178                 | -0.5856  | -0.0495  | 0.7318   | 1.333    |
| Q49    | ...because of itch, it was hard to watch television.                                         | 3.3948                 | -0.578   | 0.0279   | 0.7219   | 1.4633   |
| Q50    | ...because of itch, it was hard to play games (ex: board games, computer games, phone apps). | 3.6031                 | -0.5927  | -0.0457  | 0.6535   | 1.2273   |
| Q51    | ...because of itch, it was hard to read a book.                                              | 3.3961                 | -0.7077  | -0.0297  | 0.651    | 1.3129   |
| Q52    | ...because of itch, it was hard to watch a movie.                                            | 3.8095                 | -0.636   | -0.0244  | 0.7037   | 1.3456   |
| Q54    | ...because of itch, I made more mistakes than normal.                                        | 3.304                  | -0.9326  | -0.1188  | 0.6523   | 1.4169   |
| Q56    | ...because of itch, it was hard to do even simple tasks.                                     | 3.6659                 | -0.9355  | -0.2073  | 0.5166   | 1.2266   |
| Q59    | ...my itch interfered with my sex life.                                                      | 3.1966                 | -0.5451  | -0.0539  | 0.5684   | 1.1601   |
| Q64    | ...because of itch, I was absent from work.                                                  | 3.6651                 | -0.0541  | 0.2955   | 0.8443   | 1.5142   |
| Q65    | ...because of itch, it was hard to work.                                                     | 3.3274                 | -0.8301  | -0.2061  | 0.5564   | 1.3151   |
| Q66    | ...I limited activities with others because of how my skin looked.                           | 3.2059                 | -0.7441  | -0.1507  | 0.5786   | 1.2624   |
| Q67    | ...because of itch, I avoided being around people.                                           | 3.7958                 | -0.7027  | -0.1258  | 0.5871   | 1.2292   |
| Q70    | ...because of itch, people treated me differently.                                           | 3.5522                 | -0.3536  | 0.2029   | 0.8336   | 1.4647   |
| Q72    | ...because of itch, I avoided interacting with other people.                                 | 3.4589                 | -0.6478  | -0.0626  | 0.595    | 1.2054   |
| Q73    | ...my Itch bothered people around me.                                                        | 3.3642                 | -0.4909  | 0.0453   | 0.7326   | 1.4188   |
| Q74    | ...people told me to stop scratching.                                                        | 2.4718                 | -0.8191  | -0.2529  | 0.6407   | 1.3299   |
| Q75    | ...because of itch, I had to depend on the help of other people.                             | 3.5986                 | -0.3137  | 0.1792   | 0.8147   | 1.6113   |
| Q76    | ...I worried that my itch would get worse if people touched me.                              | 3.6428                 | -0.3852  | 0.0588   | 0.6754   | 1.2249   |
| Q77    | ...because of itch, it was hard to interact with my family.                                  | 4.5248                 | -0.4376  | 0.0693   | 0.6905   | 1.3294   |
| Q78    | ...because of itch, I avoided hugging people.                                                | 3.7169                 | -0.4448  | 0.0154   | 0.6036   | 1.2566   |

Item bank 1: Itch-interference

|                                                    |     |                                                                                                                                                 |        |         |         |        |        |
|----------------------------------------------------|-----|-------------------------------------------------------------------------------------------------------------------------------------------------|--------|---------|---------|--------|--------|
| <b>Item bank 2: Mood and sleep</b>                 | Q79 | ...I was tired of people asking questions about my itching and scratching.                                                                      | 2.7188 | -0.7177 | -0.2288 | 0.5624 | 1.2466 |
|                                                    | Q32 | ...because of itch, I was nervous.                                                                                                              | 2.655  | -1.147  | -0.5581 | 0.3243 | 1.1711 |
|                                                    | Q33 | ...I was afraid my itch would never go away                                                                                                     | 2.6089 | -1.571  | -0.8387 | 0.1085 | 0.9741 |
|                                                    | Q36 | ...because of itch, I felt angry                                                                                                                | 2.6509 | -1.1369 | -0.5615 | 0.3383 | 1.1898 |
|                                                    | Q37 | ...because of itch, I felt sad                                                                                                                  | 2.6596 | -0.8507 | -0.2609 | 0.6291 | 1.3605 |
|                                                    | Q38 | ...because of itch, I felt depressed                                                                                                            | 2.6852 | -0.7508 | -0.1548 | 0.6561 | 1.2906 |
|                                                    | Q40 | ...because of itch,I felt miserable.                                                                                                            | 3.4998 | -1.2421 | -0.5573 | 0.259  | 0.9645 |
|                                                    | Q41 | ...because of itch, I felt frustrated.                                                                                                          | 3.2349 | -1.4299 | -0.9126 | 0.0468 | 0.7907 |
|                                                    | Q42 | ...because of itch,I felt embarrassed.                                                                                                          | 2.6975 | -1.0639 | -0.4323 | 0.4081 | 1.1341 |
|                                                    | Q43 | ...because of itch, I was distracted.                                                                                                           | 2.8272 | -1.5468 | -0.7409 | 0.2583 | 1.1159 |
|                                                    | Q44 | ...I worried that others would see me scratching.                                                                                               | 2.4352 | -1.3671 | -0.7209 | 0.2088 | 0.9777 |
|                                                    | Q45 | ...because of itch, I was self-conscious.                                                                                                       | 2.7822 | -1.3275 | -0.735  | 0.197  | 1.0095 |
|                                                    | Q53 | ...because of itch, I had to stop what I was doing to scratch.                                                                                  | 2.3847 | -1.7033 | -1.0289 | 0.013  | 0.9411 |
|                                                    | Q55 | ...because of itch, it was hard to sit still.                                                                                                   | 2.919  | -1.3037 | -0.5837 | 0.3101 | 1.0373 |
|                                                    | Q57 | ...because of itch, it was hard to relax.                                                                                                       | 3.2879 | -1.4678 | -0.6576 | 0.2781 | 1.0741 |
|                                                    | Q58 | ...because of itch, I was restless.                                                                                                             | 3.577  | -1.4081 | -0.6861 | 0.1703 | 0.9799 |
|                                                    | Q60 | ...because of itch, I had difficulty falling asleep.                                                                                            | 3.3144 | -1.372  | -0.6843 | 0.1767 | 1.0434 |
|                                                    | Q61 | ...because of itch, I had trouble staying asleep.                                                                                               | 3.0339 | -1.0743 | -0.4823 | 0.2981 | 1.0837 |
|                                                    | Q63 | ...because of itch, my sleep was restless.                                                                                                      | 3.3468 | -1.1538 | -0.5436 | 0.2734 | 1.0901 |
| <b>Item bank 3: Physical activity and clothing</b> | Q11 | ...because of itch, I was less active.                                                                                                          | 3.7463 | -1.1128 | -0.3262 | 0.5907 | 1.4251 |
|                                                    | Q12 | ...because of itch, I limited exercising.                                                                                                       | 4.3319 | -0.8393 | -0.2216 | 0.5568 | 1.2357 |
|                                                    | Q13 | ...because of itch, it was hard to do some types of exercise.                                                                                   | 4.0771 | -0.8867 | -0.2509 | 0.4688 | 1.2902 |
|                                                    | Q14 | ...because of itch, it was hard to run.                                                                                                         | 4.0188 | -0.6492 | -0.1698 | 0.5702 | 1.2758 |
|                                                    | Q15 | ...because of itch, it was hard to walk.                                                                                                        | 4.0415 | -0.5939 | 0.0617  | 0.8045 | 1.5096 |
|                                                    | Q16 | ...because of itch, it was hard to do vigorous physical activity, such as running, lifting heavy objects, or participating in strenuous sports. | 4.2814 | -0.8491 | -0.1548 | 0.4951 | 1.2241 |
|                                                    | Q17 | ...because of itch, it was hard to do moderate physical activity, such as moving a table, pushing a vacuum cleaner, bowling, or playing golf.   | 4.7387 | -0.7564 | -0.0594 | 0.6488 | 1.4602 |
|                                                    | Q18 | ...because of itch, it was hard to do light physical activity.                                                                                  | 4.2854 | -0.7313 | 0.0078  | 0.7385 | 1.4334 |

|                 |     |                                                                      |        |         |         |        |        |
|-----------------|-----|----------------------------------------------------------------------|--------|---------|---------|--------|--------|
| Item<br>bank 4: | Q19 | ...because of itch, I sat around more than usual.                    | 3.8381 | -0.8595 | -0.2851 | 0.4356 | 1.2445 |
|                 | Q20 | ...because of itch, it was hard to do activities that made me sweat. | 3.2786 | -1.129  | -0.4988 | 0.3617 | 1.0313 |
|                 | Q21 | ...because of itch, I did as little as possible physically.          | 4.298  | -0.8668 | -0.2277 | 0.5511 | 1.2907 |
|                 | Q23 | ...because of itch, I limited the clothing I could wear.             | 2.4662 | -1.2306 | -0.607  | 0.3925 | 1.2079 |
|                 | Q24 | ...because of itch, it was hard to wear short-sleeves.               | 2.5739 | -0.5965 | 0.0032  | 0.7576 | 1.6012 |
|                 | Q29 | ...because of itch, it was hard to wear certain shoes.               | 2.1827 | -0.516  | -0.0396 | 0.7227 | 1.5006 |
|                 | Q31 | ...because of itch, my physical activities were limited.             | 4.5942 | -0.8352 | -0.2544 | 0.5803 | 1.2699 |
|                 | Q81 | ...I scratched myself until I bled.                                  | 2.7959 | -0.6631 | -0.0065 | 0.8183 | 1.5405 |
|                 | Q82 | ...I worried about flaking skin from scratching.                     | 2.8068 | -1.0971 | -0.3393 | 0.3693 | 1.1423 |
|                 | Q83 | ...I worried about getting scars from scratching.                    | 3.5448 | -0.8943 | -0.2092 | 0.3686 | 0.9461 |



**Supplemental Table S3. Correlation between items in bank-1 (PIQ-interference).**

| Item       | Q12  | Q25  | Q36  | Q37  | Q38  | Q39  | Q40  | Q41  | Q42  | Q44  | Q46  | Q49  | Q54  | Q55  | Q56  | Q57  | Q60  | Q62  | Q63  | Q64  | Q65  | Q66  | Q67  | Q68  |
|------------|------|------|------|------|------|------|------|------|------|------|------|------|------|------|------|------|------|------|------|------|------|------|------|------|
| <b>Q12</b> | 1.00 |      |      |      |      |      |      |      |      |      |      |      |      |      |      |      |      |      |      |      |      |      |      |      |
| <b>Q25</b> | 0.71 | 1.00 |      |      |      |      |      |      |      |      |      |      |      |      |      |      |      |      |      |      |      |      |      |      |
| <b>Q36</b> | 0.66 | 0.67 | 1.00 |      |      |      |      |      |      |      |      |      |      |      |      |      |      |      |      |      |      |      |      |      |
| <b>Q37</b> | 0.65 | 0.63 | 0.69 | 1.00 |      |      |      |      |      |      |      |      |      |      |      |      |      |      |      |      |      |      |      |      |
| <b>Q38</b> | 0.69 | 0.70 | 0.71 | 0.69 | 1.00 |      |      |      |      |      |      |      |      |      |      |      |      |      |      |      |      |      |      |      |
| <b>Q39</b> | 0.70 | 0.71 | 0.69 | 0.66 | 0.73 | 1.00 |      |      |      |      |      |      |      |      |      |      |      |      |      |      |      |      |      |      |
| <b>Q40</b> | 0.67 | 0.71 | 0.69 | 0.68 | 0.73 | 0.78 | 1.00 |      |      |      |      |      |      |      |      |      |      |      |      |      |      |      |      |      |
| <b>Q41</b> | 0.68 | 0.71 | 0.67 | 0.66 | 0.69 | 0.78 | 0.82 | 1.00 |      |      |      |      |      |      |      |      |      |      |      |      |      |      |      |      |
| <b>Q42</b> | 0.68 | 0.73 | 0.71 | 0.66 | 0.69 | 0.80 | 0.82 | 0.84 | 1.00 |      |      |      |      |      |      |      |      |      |      |      |      |      |      |      |
| <b>Q44</b> | 0.67 | 0.75 | 0.70 | 0.62 | 0.71 | 0.74 | 0.75 | 0.77 | 0.77 | 1.00 |      |      |      |      |      |      |      |      |      |      |      |      |      |      |
| <b>Q46</b> | 0.66 | 0.75 | 0.70 | 0.67 | 0.72 | 0.73 | 0.77 | 0.73 | 0.76 | 0.76 | 1.00 |      |      |      |      |      |      |      |      |      |      |      |      |      |
| <b>Q49</b> | 0.65 | 0.68 | 0.69 | 0.66 | 0.68 | 0.69 | 0.72 | 0.69 | 0.71 | 0.68 | 0.73 | 1.00 |      |      |      |      |      |      |      |      |      |      |      |      |
| <b>Q54</b> | 0.72 | 0.66 | 0.72 | 0.70 | 0.69 | 0.70 | 0.69 | 0.69 | 0.70 | 0.67 | 0.68 | 0.68 | 1.00 |      |      |      |      |      |      |      |      |      |      |      |
| <b>Q55</b> | 0.64 | 0.69 | 0.67 | 0.63 | 0.69 | 0.68 | 0.71 | 0.72 | 0.72 | 0.72 | 0.77 | 0.71 | 0.72 | 1.00 |      |      |      |      |      |      |      |      |      |      |
| <b>Q56</b> | 0.63 | 0.65 | 0.70 | 0.62 | 0.72 | 0.68 | 0.69 | 0.67 | 0.70 | 0.69 | 0.74 | 0.70 | 0.68 | 0.75 | 1.00 |      |      |      |      |      |      |      |      |      |
| <b>Q57</b> | 0.67 | 0.68 | 0.73 | 0.63 | 0.71 | 0.71 | 0.68 | 0.68 | 0.71 | 0.69 | 0.75 | 0.73 | 0.70 | 0.73 | 0.81 | 1.00 |      |      |      |      |      |      |      |      |
| <b>Q60</b> | 0.69 | 0.67 | 0.76 | 0.67 | 0.70 | 0.71 | 0.69 | 0.66 | 0.70 | 0.68 | 0.69 | 0.69 | 0.76 | 0.70 | 0.71 | 0.75 | 1.00 |      |      |      |      |      |      |      |
| <b>Q62</b> | 0.64 | 0.68 | 0.68 | 0.63 | 0.70 | 0.71 | 0.67 | 0.67 | 0.69 | 0.69 | 0.73 | 0.72 | 0.66 | 0.72 | 0.76 | 0.82 | 0.74 | 1.00 |      |      |      |      |      |      |
| <b>Q63</b> | 0.68 | 0.69 | 0.73 | 0.69 | 0.68 | 0.71 | 0.69 | 0.67 | 0.71 | 0.65 | 0.70 | 0.68 | 0.73 | 0.69 | 0.69 | 0.73 | 0.81 | 0.74 | 1.00 |      |      |      |      |      |
| <b>Q64</b> | 0.60 | 0.62 | 0.64 | 0.63 | 0.65 | 0.63 | 0.64 | 0.62 | 0.65 | 0.61 | 0.66 | 0.62 | 0.64 | 0.63 | 0.66 | 0.64 | 0.65 | 0.63 | 0.69 | 1.00 |      |      |      |      |
| <b>Q65</b> | 0.71 | 0.68 | 0.70 | 0.68 | 0.71 | 0.68 | 0.71 | 0.71 | 0.71 | 0.70 | 0.70 | 0.69 | 0.74 | 0.68 | 0.69 | 0.71 | 0.74 | 0.70 | 0.77 | 0.71 | 1.00 |      |      |      |
| <b>Q66</b> | 0.67 | 0.71 | 0.75 | 0.67 | 0.71 | 0.70 | 0.70 | 0.68 | 0.72 | 0.70 | 0.72 | 0.71 | 0.72 | 0.70 | 0.71 | 0.73 | 0.74 | 0.71 | 0.74 | 0.70 | 0.75 | 1.00 |      |      |
| <b>Q67</b> | 0.71 | 0.74 | 0.75 | 0.68 | 0.75 | 0.75 | 0.77 | 0.75 | 0.76 | 0.73 | 0.75 | 0.73 | 0.76 | 0.73 | 0.72 | 0.76 | 0.78 | 0.77 | 0.76 | 0.69 | 0.79 | 0.77 | 1.00 |      |
| <b>Q68</b> | 0.67 | 0.69 | 0.74 | 0.65 | 0.70 | 0.69 | 0.71 | 0.73 | 0.72 | 0.70 | 0.73 | 0.73 | 0.70 | 0.70 | 0.73 | 0.76 | 0.73 | 0.78 | 0.72 | 0.64 | 0.73 | 0.77 | 0.80 | 1.00 |
| <b>Q69</b> | 0.60 | 0.63 | 0.67 | 0.60 | 0.68 | 0.65 | 0.65 | 0.65 | 0.68 | 0.63 | 0.68 | 0.66 | 0.61 | 0.68 | 0.70 | 0.72 | 0.70 | 0.67 | 0.68 | 0.74 | 0.67 | 0.72 | 0.68 | 0.71 |

**Supplementary Table S4. Correlation between items in bank-2 (PIQ-mood and sleep).**

| Item | Q22  | Q23  | Q26  | Q27  | Q28  | Q30  | Q31  | Q32  | Q33  | Q34  | Q35  | Q43  | Q45  | Q47  | Q48  | Q50  | Q51  |
|------|------|------|------|------|------|------|------|------|------|------|------|------|------|------|------|------|------|
| Q22  | 1.00 |      |      |      |      |      |      |      |      |      |      |      |      |      |      |      |      |
| Q23  | 0.65 | 1.00 |      |      |      |      |      |      |      |      |      |      |      |      |      |      |      |
| Q26  | 0.68 | 0.61 | 1.00 |      |      |      |      |      |      |      |      |      |      |      |      |      |      |
| Q27  | 0.66 | 0.61 | 0.72 | 1.00 |      |      |      |      |      |      |      |      |      |      |      |      |      |
| Q28  | 0.69 | 0.59 | 0.72 | 0.82 | 1.00 |      |      |      |      |      |      |      |      |      |      |      |      |
| Q30  | 0.66 | 0.71 | 0.70 | 0.70 | 0.71 | 1.00 |      |      |      |      |      |      |      |      |      |      |      |
| Q31  | 0.65 | 0.67 | 0.71 | 0.65 | 0.62 | 0.73 | 1.00 |      |      |      |      |      |      |      |      |      |      |
| Q32  | 0.67 | 0.61 | 0.64 | 0.65 | 0.68 | 0.68 | 0.62 | 1.00 |      |      |      |      |      |      |      |      |      |
| Q33  | 0.64 | 0.63 | 0.66 | 0.66 | 0.63 | 0.69 | 0.69 | 0.63 | 1.00 |      |      |      |      |      |      |      |      |
| Q34  | 0.63 | 0.59 | 0.58 | 0.59 | 0.61 | 0.64 | 0.64 | 0.68 | 0.57 | 1.00 |      |      |      |      |      |      |      |
| Q35  | 0.64 | 0.62 | 0.59 | 0.60 | 0.60 | 0.67 | 0.66 | 0.72 | 0.63 | 0.81 | 1.00 |      |      |      |      |      |      |
| Q43  | 0.58 | 0.63 | 0.55 | 0.50 | 0.53 | 0.63 | 0.66 | 0.54 | 0.61 | 0.61 | 0.62 | 1.00 |      |      |      |      |      |
| Q45  | 0.62 | 0.61 | 0.62 | 0.59 | 0.59 | 0.67 | 0.67 | 0.63 | 0.68 | 0.60 | 0.64 | 0.71 | 1.00 |      |      |      |      |
| Q47  | 0.62 | 0.65 | 0.66 | 0.59 | 0.61 | 0.70 | 0.70 | 0.60 | 0.68 | 0.62 | 0.67 | 0.73 | 0.73 | 1.00 |      |      |      |
| Q48  | 0.65 | 0.64 | 0.64 | 0.61 | 0.61 | 0.71 | 0.70 | 0.61 | 0.68 | 0.62 | 0.67 | 0.71 | 0.77 | 0.82 | 1.00 |      |      |
| Q50  | 0.61 | 0.65 | 0.62 | 0.61 | 0.61 | 0.70 | 0.69 | 0.63 | 0.64 | 0.60 | 0.66 | 0.63 | 0.67 | 0.74 | 0.73 | 1.00 |      |
| Q51  | 0.59 | 0.61 | 0.60 | 0.64 | 0.64 | 0.66 | 0.66 | 0.65 | 0.64 | 0.58 | 0.63 | 0.59 | 0.66 | 0.64 | 0.69 | 0.80 | 1.00 |
| Q53  | 0.64 | 0.65 | 0.63 | 0.66 | 0.65 | 0.70 | 0.67 | 0.67 | 0.65 | 0.60 | 0.63 | 0.62 | 0.69 | 0.69 | 0.74 | 0.81 | 0.84 |

**Supplementary Table S5. Correlation between items in bank-3 (PIQ-clothing and physical activity).**

| <b>Item</b> | <b>Q1</b> | <b>Q2</b> | <b>Q3</b> | <b>Q4</b> | <b>Q5</b> | <b>Q6</b> | <b>Q7</b> | <b>Q8</b> | <b>Q9</b> | <b>Q10</b> | <b>Q11</b> | <b>Q13</b> | <b>Q14</b> | <b>Q19</b> |
|-------------|-----------|-----------|-----------|-----------|-----------|-----------|-----------|-----------|-----------|------------|------------|------------|------------|------------|
| <b>Q1</b>   | 1.00      |           |           |           |           |           |           |           |           |            |            |            |            |            |
| <b>Q2</b>   | 0.81      | 1.00      |           |           |           |           |           |           |           |            |            |            |            |            |
| <b>Q3</b>   | 0.76      | 0.80      | 1.00      |           |           |           |           |           |           |            |            |            |            |            |
| <b>Q4</b>   | 0.74      | 0.78      | 0.78      | 1.00      |           |           |           |           |           |            |            |            |            |            |
| <b>Q5</b>   | 0.73      | 0.74      | 0.73      | 0.81      | 1.00      |           |           |           |           |            |            |            |            |            |
| <b>Q6</b>   | 0.73      | 0.79      | 0.80      | 0.81      | 0.78      | 1.00      |           |           |           |            |            |            |            |            |
| <b>Q7</b>   | 0.76      | 0.77      | 0.78      | 0.79      | 0.78      | 0.80      | 1.00      |           |           |            |            |            |            |            |
| <b>Q8</b>   | 0.75      | 0.75      | 0.75      | 0.76      | 0.80      | 0.73      | 0.83      | 1.00      |           |            |            |            |            |            |
| <b>Q9</b>   | 0.74      | 0.76      | 0.75      | 0.72      | 0.72      | 0.75      | 0.77      | 0.77      | 1.00      |            |            |            |            |            |
| <b>Q10</b>  | 0.71      | 0.75      | 0.73      | 0.73      | 0.66      | 0.74      | 0.75      | 0.70      | 0.76      | 1.00       |            |            |            |            |
| <b>Q11</b>  | 0.74      | 0.79      | 0.75      | 0.73      | 0.74      | 0.76      | 0.78      | 0.77      | 0.82      | 0.77       | 1.00       |            |            |            |
| <b>Q13</b>  | 0.66      | 0.68      | 0.66      | 0.65      | 0.64      | 0.65      | 0.68      | 0.68      | 0.67      | 0.68       | 0.67       | 1.00       |            |            |
| <b>Q14</b>  | 0.65      | 0.65      | 0.65      | 0.64      | 0.68      | 0.66      | 0.70      | 0.72      | 0.62      | 0.59       | 0.66       | 0.66       | 1.00       |            |
| <b>Q19</b>  | 0.60      | 0.61      | 0.56      | 0.60      | 0.65      | 0.60      | 0.65      | 0.66      | 0.59      | 0.54       | 0.60       | 0.57       | 0.63       | 1.00       |
| <b>Q21</b>  | 0.74      | 0.79      | 0.77      | 0.73      | 0.76      | 0.80      | 0.79      | 0.78      | 0.77      | 0.75       | 0.82       | 0.69       | 0.68       | 0.63       |

**Supplementary Table S6.**  
**Correlation between items in**  
**bank-4 (PIQ-Scratching**  
**behavior).**

| <b>Item</b> | <b>Q71</b> | <b>Q72</b> | <b>Q73</b> | <b>Q74</b> |
|-------------|------------|------------|------------|------------|
| <b>Q71</b>  | 1.00       |            |            |            |
| <b>Q72</b>  | 0.65       | 1.00       |            |            |
| <b>Q73</b>  | 0.68       | 0.69       | 1.00       |            |
| <b>Q74</b>  | 0.58       | 0.62       | 0.65       | 1.00       |
| <b>Q75</b>  | 0.73       | 0.72       | 0.77       | 0.68       |
